# Supplementary material for: Changes in Waist Circumference and the Incidence of Diabetes in Middle-Aged Men and Women
Source: PubMed Central journal article supplement (PMC3150401; doi:10.1371/journal.pone.0023104), 2011-08-04

## Legend figure S1

Abbreviations: BMI, body mass index. HR, hazard ratio. WC, waist circumference

Lines are the hazard ratios (areas the 95%-confidence intervals) derived from Cox's proportional-hazard models where WC and BMI were included as restricted cubic splines (3 knots). Reference points are the respective means of WC and BMI. Years since the examination in 1999-02 was used as time axis.

*Adjustments:* years between examinations, age in 1999-02, chronic diseases, smoking habits, Mediterranean diet score, energy intake, education, drinking pattern, sports activity and menopausal status (women only).

### Men

BMI in 1999-02: Test of linearity  $P= 0.62$  (linear). Test of effect  $P< 0.0001$  (with adjustment for covariates, but without adjustment for WC)

BMI in 1999-02: Test of linearity  $P= 0.77$  (linear). Test of effect  $P< 0.0001$  (with adjustment for covariates and WC)

WC in 1999-02: Test of linearity  $P=0.89$  (linear). Test of effect  $P< 0.0001$  (with adjustment for covariates, but without adjustment for BMI)

WC in 1999-02: Test of linearity  $P=0.86$  (linear). Test of effect  $P< 0.01$  (with adjustment for covariates and BMI)

### Women

BMI in 1999-02: Test of linearity  $P= 0.04$  (nonlinear). Test of effect  $P< 0.0001$  (with adjustment for covariates, but without adjustment for WC)

BMI in 1999-02: Test of linearity  $P= 0.17$  (linear). Test of effect  $P< 0.0001$  (with adjustment for covariates and WC)

WC in 1999-02: Test of linearity  $P= 0.81$  (linear). Test of effect  $P< 0.0001$  (with adjustment for covariates, but without adjustment for BMI)

WC in 1999-02: Test of linearity  $P= 0.79$  (linear). Test of effect  $P< 0.0001$  (with adjustment for covariates and BMI)

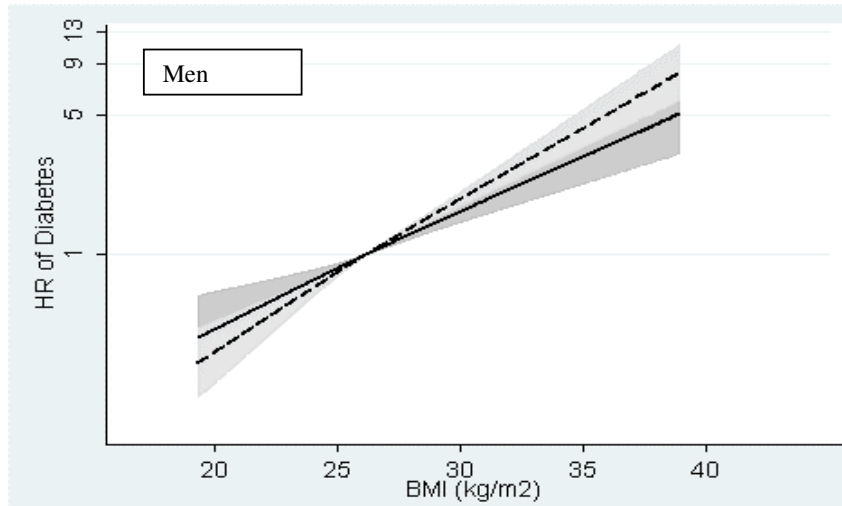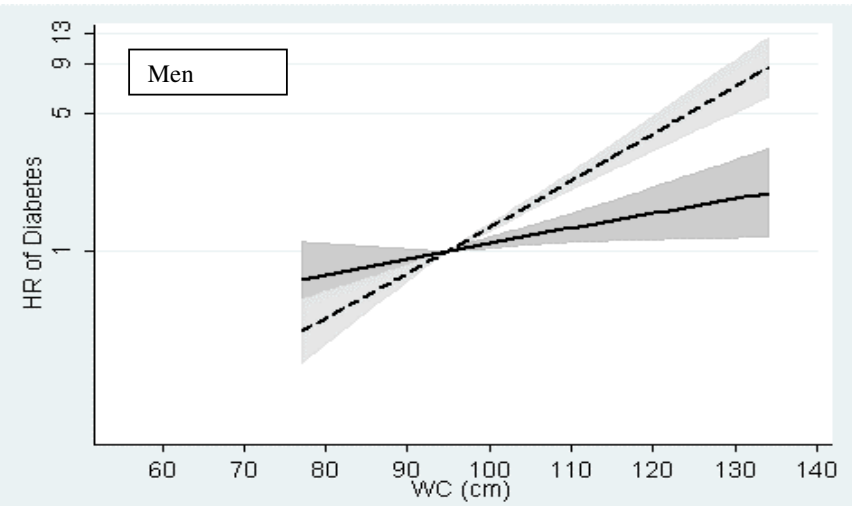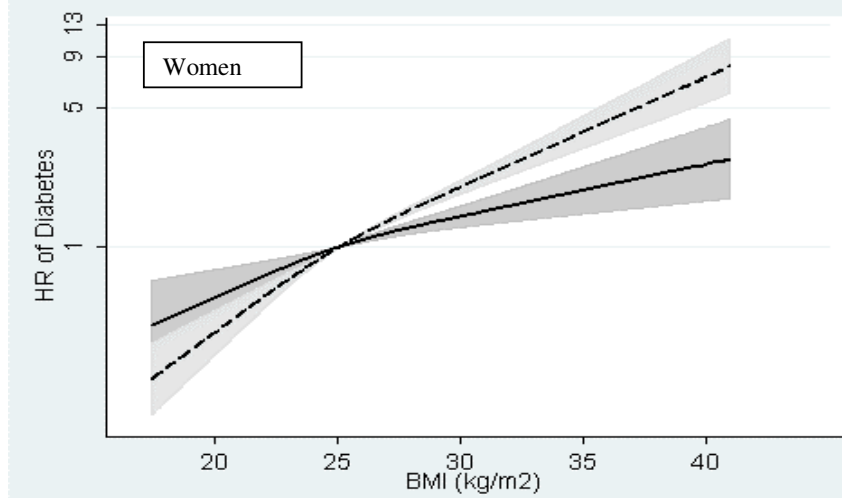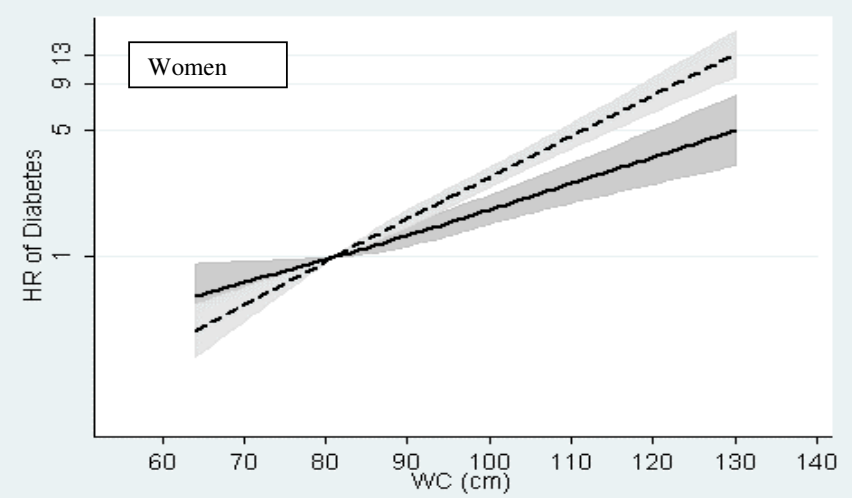

Supplement: pone.0023104.s001.pdf [file pone.0023104.s001.pdf]
